# Supplementary material for: Profiling of aerosol microphysical properties at several EARLINET/AERONET sites during the July 2012 ChArMEx/EMEP campaign
Source: Copernicus journal article supplement (doi:10.5194/acp-16-7043-2016), 2016-06-09
Supplement: Supplementary file 1 [file acp-16-7043-2016-supplement.pdf]

Supplement of Atmos. Chem. Phys., 16, 7043–7066, 2016  
<http://www.atmos-chem-phys.net/16/7043/2016/>  
doi:10.5194/acp-16-7043-2016-supplement  
© Author(s) 2016. CC Attribution 3.0 License.

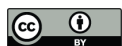

Atmospheric  
Chemistry  
and Physics  
Open Access  
EGU

*Supplement of*

**Profiling of aerosol microphysical properties at several  
EARLINET/AERONET sites during the July 2012  
ChArMEx/EMEP campaign**

María José Granados-Muñoz et al.

*Correspondence to:* María José Granados Muñoz (mamunoz@jpl.nasa.gov)

The copyright of individual parts of the supplement might differ from the CC-BY 3.0 licence.

Supplementary material:

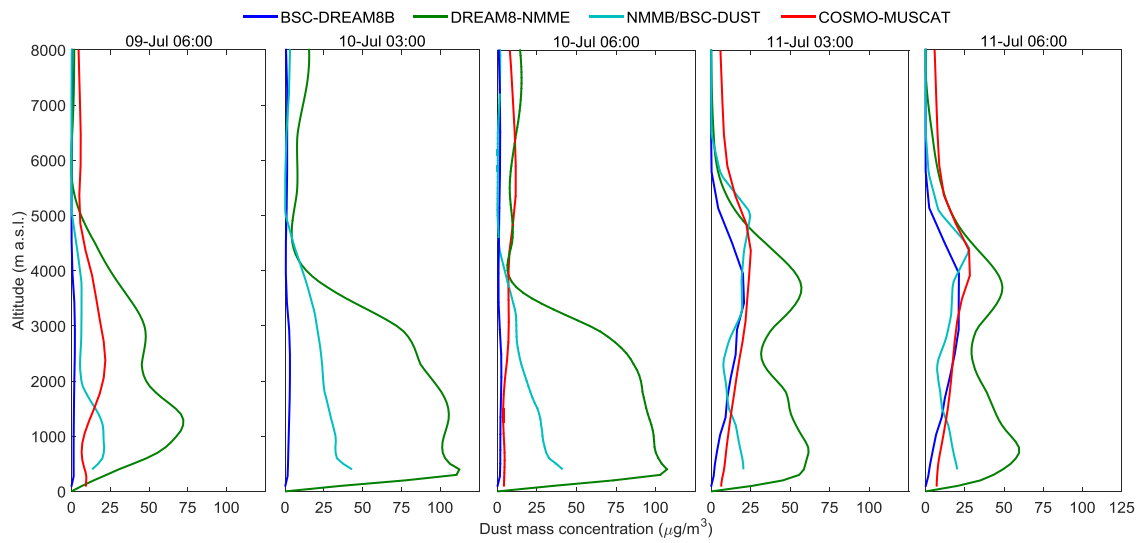

*Figure S1. Dust mass concentration profiles forecast by BSC-DREAM8b-v2, DREAM8-NMME, NMMB/BSC-Dust and COSMO-MUSCAT at Athens in the period 9 July 2012-11 July 2012. Only those data coincident with AERONET inversion retrievals ( $\pm 3$  hours) has been presented here.*

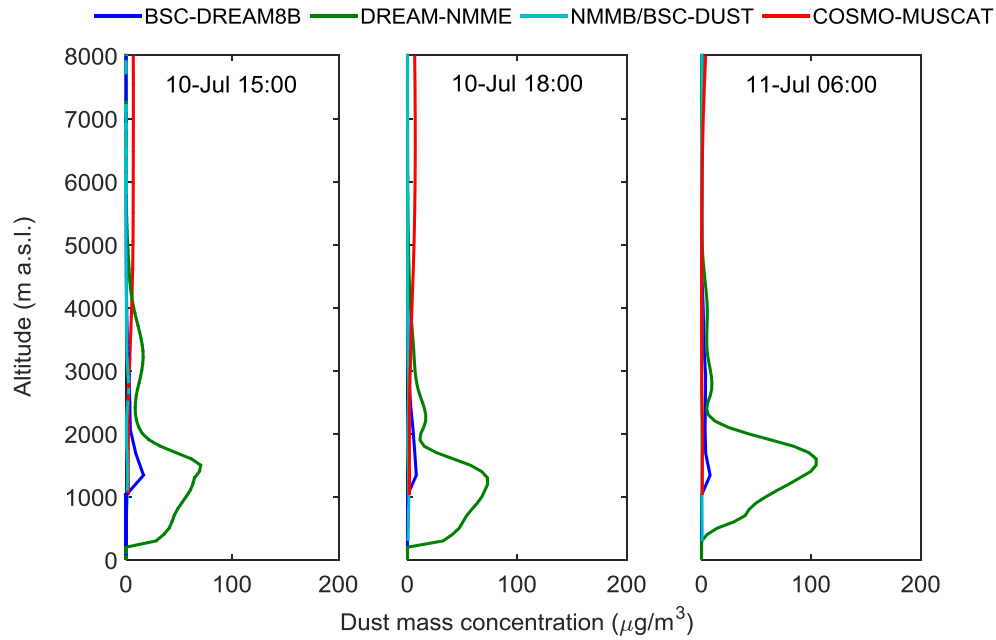

*Figure S2. Dust mass concentration profiles forecast by BSC-DREAM8b-v2, DREAM8-NMME, DREAMABOL and NMMB/BSC-Dust at Barcelona in the period 9 July 2012-11 July 2012. Only those data coincident with AERONET inversion retrievals ( $\pm 3$  hours) has been presented here.*

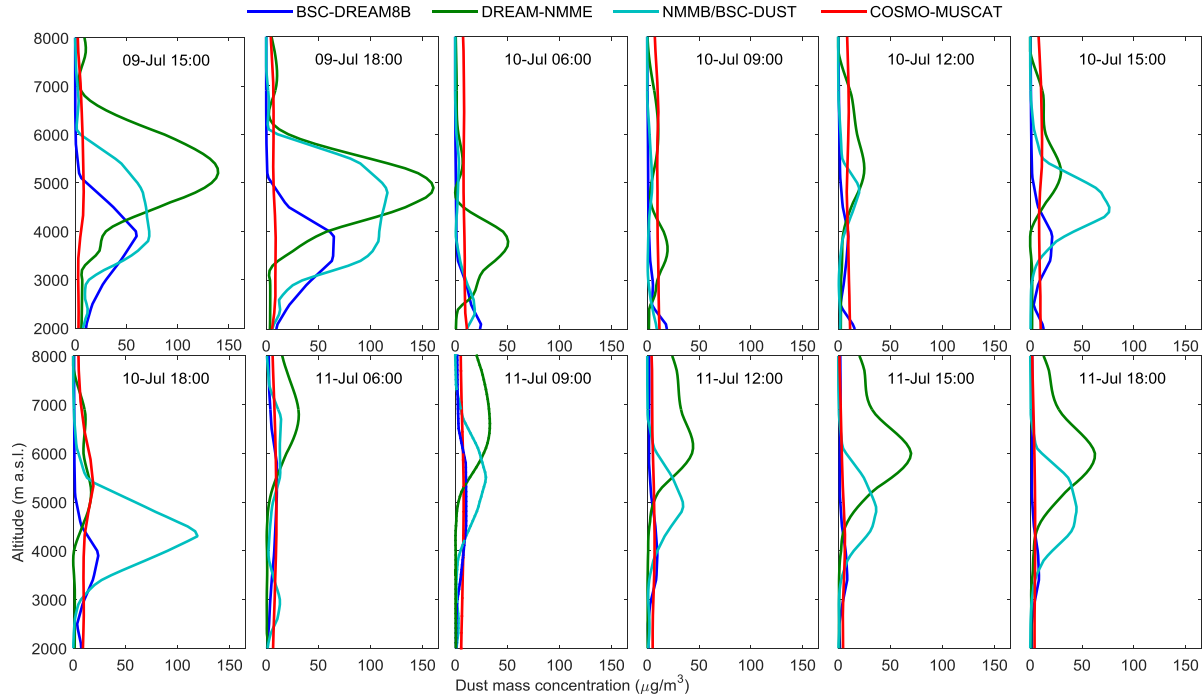

*Figure S3. Dust mass concentration profiles forecast by BSC-DREAM8b-v2, DREAM8-NMME, NMMB/BSC-Dust and COSMO-MUSCAT at Bucharest in the period 9 July 2012-11 July 2012. Only those data coincident with AERONET inversion retrievals ( $\pm 3$  hours) has been presented here.*

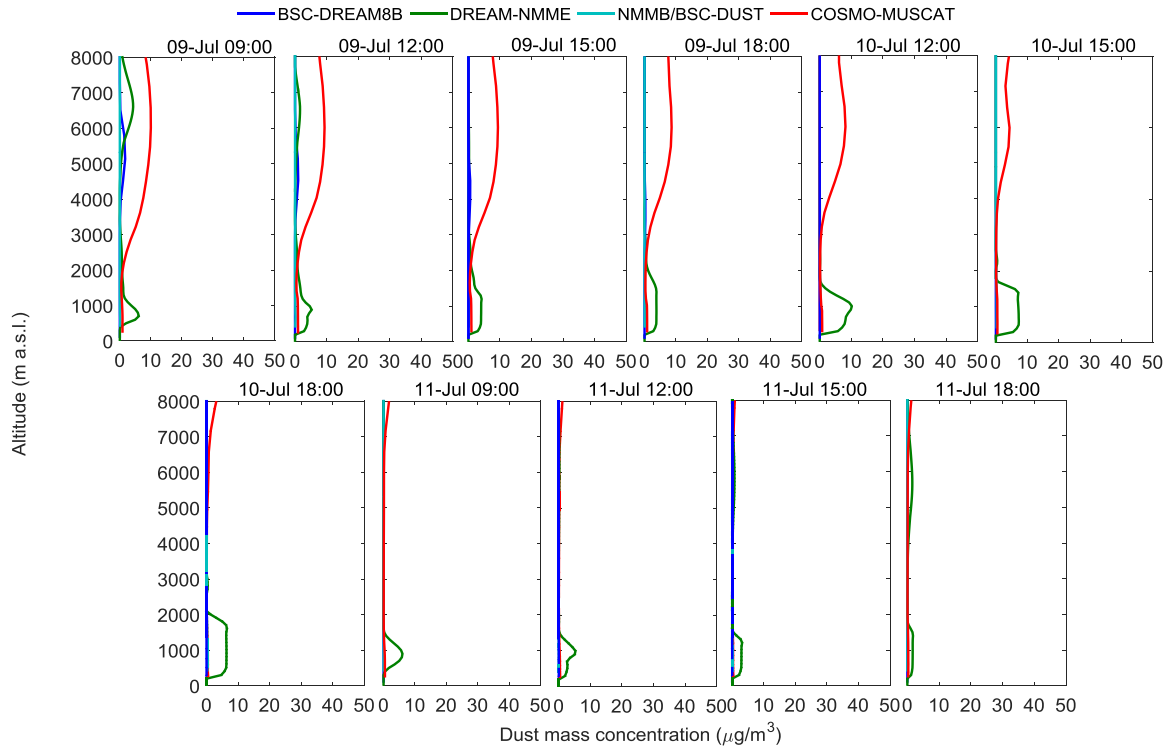

*Figure S4. Dust mass concentration profiles forecast by BSC-DREAM8b-v2, DREAM8-NMME, NMMB/BSC-Dust and COSMO-MUSCAT at Évora in the period 9 July 2012-11 July 2012. Only those data coincident with AERONET inversion retrievals ( $\pm 3$  hours) has been presented here.*

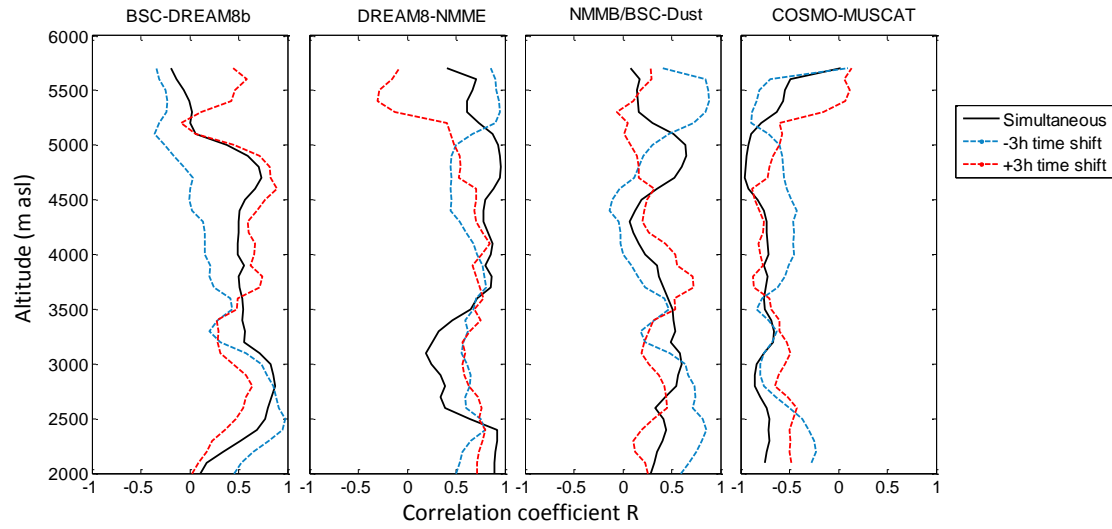

Figure S5. Correlation coefficient  $R$  between simultaneous LIRIC and modelled time series (solid black lines) for every altitude level. Dashed lines represent  $R$  values obtained for the modelled time series and LIRIC time series with a time shift of plus (red line) and minus (blue line) 3 hours.
